# Supplementary material
Source: publisher site journal article supplement (https://www.dovepress.com/article/371162)
Supplement: Supplementary file 1 [file get_supplementary_file.php]

**Supplemental Material**

**PubMed (or MEDLINE (via PubMed)):** <http://www.library.vanderbilt.edu/eres?id=145>

**Date Last Searched: 12/14/2020**

("Minority Health"[Mesh] OR minority health[tiab] OR "African Americans"[Mesh] OR African Americans[tiab] OR African American[tiab] OR black[tiab] OR blacks[tiab] OR "Minority Groups"[Mesh] OR minority[tiab] OR minorities[tiab] OR "Race Factors"[Mesh] OR race[tiab] OR racial[tiab] OR racially[tiab] OR ethnic[tiab] OR ethnically[tiab] OR ethnicity[tiab] OR underserved[tiab]) AND ("Diabetes Mellitus"[Mesh] OR diabetes[tiab] OR diabetic[tiab] OR diabetics[tiab] OR "Hypertension"[Mesh] OR hypertension[tiab] OR hypertensive[tiab] OR high blood pressure[tiab] OR high blood pressures[tiab] OR "Kidney Failure, Chronic"[Mesh] OR ESRD[tiab] OR ESKD[tiab] OR end stage renal disease[tiab] OR end stage renal diseases[tiab] OR end stage kidney disease[tiab] OR end stage kidney diseases[tiab] OR end stage renal failure[tiab] OR end stage renal insufficiency[tiab] OR end stage kidney failure[tiab] OR "Renal Insufficiency, Chronic"[Mesh] OR chronic kidney disease[tiab] OR chronic kidney diseases[tiab] OR chronic renal disease[tiab] OR chronic renal diseases[tiab] OR chronic kidney failure[tiab] OR chronic renal failure[tiab] OR chronic kidney insufficiency[tiab] OR chronic renal insufficiency[tiab] OR chronic renal insufficiencies[tiab] OR "Renal Dialysis"[Mesh] OR renal dialysis[tiab] OR renal dialyses[tiab] OR kidney dialysis[tiab] OR extracorporeal dialysis[tiab] OR extracorporeal dialyses[tiab] OR hemodialysis[tiab] OR hemodialysis[tiab] OR haemodialysis[tiab] OR hemodialysis[tiab]) AND ("Therapeutic Alliance"[Mesh] OR therapeutic alliance[tiab] OR therapeutic alliances[tiab] OR therapy alliance[tiab] OR therapy alliances[tiab] OR therapeutic relationship[tiab] OR therapeutic relationships[tiab] OR therapy relationship[tiab] OR therapy relationships[tiab] OR working alliance[tiab] OR working alliances[tiab] OR "Motivational Interviewing"[Mesh] OR motivational interviewing[tiab] OR motivational interview[tiab] OR motivational interviews[tiab] OR motivation interviewing[tiab] OR motivation interview[tiab] OR "Social Support"[Mesh] OR social support[tiab] OR psychosocial support[tiab] OR psycho-social support[tiab] OR support system[tiab] OR support systems[tiab] OR family support[tiab] OR familial support[tiab] OR family member support[tiab] OR supportive family[tiab] OR supportive families[tiab] OR community support[tiab] OR supportive community[tiab] OR supportive communities[tiab] OR health system support[tiab] OR "Directive Counseling"[Mesh] OR directive counseling[tiab] OR directive counsel[tiab] OR prescriptive counseling[tiab] OR "Patient Care Team"[Mesh] OR patient care team[tiab] OR patient care teams[tiab] OR health care team[tiab] OR health care teams[tiab] OR healthcare team[tiab] OR healthcare teams[tiab] OR health team[tiab] OR health teams[tiab] OR medical care team[tiab] OR medical care teams[tiab] OR multidisciplinary[tiab] OR multi-disciplinary[tiab] OR interdisciplinary[tiab] OR inter-disciplinary[tiab] OR multidisciplinary[tiab] OR multi-disciplinarity[tiab] OR interdisciplinarity[tiab] OR inter-disciplinarity[tiab] OR team based[tiab] OR "Patient Care Management"[Mesh] OR patient care management[tiab] OR patient management[tiab] OR care management[tiab] OR medication management[tiab] OR medication control[tiab] OR therapy management[tiab] OR therapy control[tiab] OR treatment management[tiab] OR treatment control[tiab] OR therapeutic management[tiab] OR therapeutic control[tiab] OR disease management[tiab] OR disease control[tiab] OR hypertension management[tiab] OR hypertension control[tiab] OR hypertensive management[tiab] OR hypertensive control[tiab] OR blood pressure management[tiab] OR blood pressure control[tiab] OR diabetes management[tiab] OR diabetes control[tiab] OR diabetic management[tiab] OR diabetic control[tiab] OR chronic condition management[tiab] OR chronic illness management[tiab] OR "Self-Management"[Mesh] OR self management[tiab] OR self managed[tiab] OR self managing[tiab] OR self manages[tiab]) AND ("Medication Adherence"[Mesh] OR medication adherence[tiab] OR medication adherent[tiab] OR medication compliance[tiab] OR medication compliant[tiab] OR adherence to medication[tiab] OR adherent to medication[tiab] OR compliance to medication[tiab] OR medication persistence[tiab] OR refill adherence[tiab] OR pharmaceutical adherence[tiab] OR pharmaceutical compliance[tiab] OR drug therapy compliance[tiab] OR drug therapy adherence[tiab] OR drug adherence[tiab] OR drug adherent[tiab] OR drug compliance[tiab] OR drug compliant[tiab] OR (("Hypoglycemic Agents"[Mesh] OR hypoglycemic agent[tiab] OR hypoglycemic agents[tiab] OR hypoglycemic drug[tiab] OR hypoglycemic drugs[tiab] OR hypoglycemic medication[tiab] OR hypoglycemic medications[tiab] OR hypoglycemic prescription[tiab] OR hypoglycemics[tiab] OR antihyperglycemic agent[tiab] OR antihyperglycemic agents[tiab] OR antihyperglycemic drug[tiab] OR antihyperglycemic drugs[tiab] OR antihyperglycemic medication[tiab] OR antihyperglycemic medications[tiab] OR antihyperglycemic prescription[tiab] OR antihyperglycemics[tiab] OR anti-hyperglycemic agent[tiab] OR anti-hyperglycemic agents[tiab] OR anti-hyperglycemic drug[tiab] OR anti-hyperglycemic drugs[tiab] OR anti-hyperglycemic medication[tiab] OR anti-hyperglycemic medications[tiab] OR anti-hyperglycemics[tiab] OR antidiabetic agent[tiab] OR antidiabetic agents[tiab] OR antidiabetic drug[tiab] OR antidiabetic drugs[tiab] OR antidiabetic medication[tiab] OR antidiabetic medications[tiab] OR antidiabetic prescription[tiab] OR antidiabetic prescriptions[tiab] OR antidiabetics[tiab] OR anti-diabetic agent[tiab] OR anti-diabetic agents[tiab] OR anti-diabetic drug[tiab] OR anti-diabetic drugs[tiab] OR anti-diabetic medication[tiab] OR anti-diabetic medications[tiab] OR anti-diabetic prescription[tiab] OR anti-diabetic prescriptions[tiab] OR anti-diabetics[tiab] OR "Antihypertensive Agents"[Mesh] OR antihypertensive agent[tiab] OR antihypertensive agents[tiab] OR antihypertensive drug[tiab] OR antihypertensive drugs[tiab] OR antihypertensive medication[tiab] OR antihypertensive medications[tiab] OR antihypertensive prescription[tiab] OR antihypertensive prescriptions[tiab] OR antihypertensives[tiab] OR anti hypertensive agent[tiab] OR anti hypertensive agents[tiab] OR anti hypertensive drug[tiab] OR anti hypertensive drugs[tiab] OR anti hypertensive medication[tiab] OR anti hypertensive medications[tiab] OR anti hypertensives[tiab]) AND ("Treatment Adherence and Compliance"[Mesh] OR adherence[tiab] OR non-adherence[tiab] OR nonadherence[tiab] OR adherent[tiab] OR non-adherent[tiab] OR nonadherent[tiab] OR compliance[tiab] OR non-compliance[tiab] OR noncompliance[tiab] OR compliant[tiab] OR non-compliant[tiab] OR noncompliant[tiab]))) AND ("2009/01/01"[PDAT] : "2020/12/31"[PDAT] AND English[lang])

**380** Results

Limited to publication dates 2009-2020

Limited to English

**CINAHL (EBSCOhost):** <http://www.library.vanderbilt.edu/eres?id=29>

**Date Last Searched: 12/14/2020**

(MH “Blacks” OR TI minority health OR AB minority health OR TI African American OR AB African American OR TI African Americans OR AB African Americans OR TI black OR AB black OR TI blacks OR AB blacks OR MH “Minority Groups” OR TI minority OR AB minority OR TI minorities OR AB minorities OR MH “Race Factors” OR TI race OR AB race OR TI racial OR AB racial OR TI racially OR AB racially OR TI ethnic OR AB ethnic OR TI ethnically OR AB ethnically OR TI ethnicity OR AB ethnicity OR TI underserved OR AB underserved) AND (MH “Diabetes Mellitus+” OR TI diabetes OR AB diabetes OR TI diabetic OR AB diabetic OR TI diabetics OR AB diabetics OR MH “Hypertension+” OR TI hypertension OR AB hypertension OR TI hypertensive OR AB hypertensive OR TI high blood pressure OR AB high blood pressure OR TI high blood pressures OR AB high blood pressures OR MH “Kidney Failure, Chronic+” OR TI ESRD OR AB ESRD OR TI ESKD OR AB ESKD OR TI end stage renal disease OR AB end stage renal disease OR TI end stage renal diseases OR AB end stage renal diseases OR TI end stage kidney disease OR AB end stage kidney disease OR TI end stage kidney diseases OR AB end stage kidney diseases OR TI end stage renal failure OR AB end stage renal failure OR TI end stage kidney failure OR AB end stage kidney failure OR MH “Renal Insufficiency, Chronic+” OR TI chronic kidney disease OR AB chronic kidney disease OR TI chronic kidney diseases OR AB chronic kidney diseases OR TI chronic renal disease OR AB chronic renal disease OR TI chronic renal diseases OR AB chronic renal diseases OR TI chronic kidney failure OR AB chronic kidney failure OR TI chronic renal failure OR AB chronic renal failure OR TI chronic kidney insufficiency OR AB chronic kidney insufficiency OR TI chronic renal insufficiency OR AB chronic renal insufficiency OR TI chronic renal insufficiencies OR AB chronic renal insufficiencies OR MH “Hemodialysis+” OR MH “Dialysis Patients” OR TI renal dialysis OR AB renal dialysis OR TI renal dialyses OR AB renal dialyses OR TI kidney dialysis OR AB kidney dialysis OR TI extracorporeal dialysis OR AB extracorporeal dialysis OR TI extracorporeal dialyses OR AB extracorporeal dialyses OR TI hemodialysis OR AB hemodialysis OR TI hemodialyses OR AB hemodialyses OR TI haemodialysis OR AB haemodialysis OR TI hemodialysis OR AB hemodialysis) AND (MH “Therapeutic Alliance” OR TI therapeutic alliance OR AB therapeutic alliance OR TI therapeutic alliances OR AB therapeutic alliances OR TI therapy alliance OR AB therapy alliance OR TI therapy alliances OR AB therapy alliances OR TI therapeutic relationship OR AB therapeutic relationship OR TI therapeutic relationships OR AB therapeutic relationships OR TI therapy relationship OR AB therapy relationship OR TI therapy relationships OR AB therapy relationships OR TI working alliance OR AB working alliance OR TI working alliances OR AB working alliances OR MH “Motivational Interviewing” OR TI motivational interviewing OR AB motivational interviewing OR TI motivational interview OR AB motivational interview OR TI motivational interviews OR AB motivational interviews OR TI motivation interviewing OR AB motivation interviewing OR TI motivation interview OR AB motivation interview OR TI motivation interviews OR AB motivation interviews OR MH “Support, Psychosocial+” OR TI social support OR AB social support OR TI psychosocial support OR AB psychosocial support OR TI psycho-social support OR AB psycho-social support OR TI support system OR AB support system OR TI support systems OR AB support systems OR TI family support OR AB family support OR TI familial support OR AB familial support OR TI family member support OR AB family member support OR TI supportive family OR AB supportive family OR TI supportive families OR AB supportive families OR TI community support OR AB community support OR TI supportive community OR AB supportive community OR TI supportive communities OR AB supportive communities OR TI health system support OR AB health system support OR TI directive counseling OR AB directive counseling OR TI directive counsel OR AB directive counsel OR TI prescriptive counseling OR AB prescriptive counseling OR MH “Multidisciplinary Care Team+” OR TI patient care team OR AB patient care team OR TI patient care teams OR AB patient care teams OR TI health care team OR AB health care team OR TI health care teams OR AB health care teams OR TI healthcare team OR AB healthcare team OR TI healthcare teams OR AB healthcare teams OR TI health team OR AB health team OR TI health teams OR AB health teams OR TI medical care team OR AB medical care team OR TI medical care teams OR AB medical care teams OR TI multidisciplinary OR AB multidisciplinary OR TI multi-disciplinary OR AB multi-disciplinary OR TI interdisciplinary OR AB interdisciplinary OR TI inter-disciplinary OR AB inter-disciplinary OR TI multidisciplinary OR AB multidisciplinary OR TI multi-disciplinarity OR AB multi-disciplinarity OR TI interdisciplinarity OR AB interdisciplinarity OR TI inter-disciplinarity OR AB inter-disciplinarity OR TI team based OR AB team based OR TI patient care management OR AB patient care management OR TI patient management OR AB patient management OR TI care management OR AB care management OR TI medication management OR AB medication management OR TI medication control OR AB medication control OR TI therapy management OR AB therapy management OR TI therapy control OR AB therapy control OR TI treatment management OR AB treatment management OR TI treatment control OR AB treatment control OR TI therapeutic management OR AB therapeutic management OR TI therapeutic control OR AB therapeutic control OR MH “Disease Management+” OR TI disease management OR AB disease management OR TI disease control OR AB disease control OR TI hypertension management OR AB hypertension management OR TI hypertension control OR AB hypertension control OR TI hypertensive management OR AB hypertensive management OR TI hypertensive control OR AB hypertensive control OR TI blood pressure management OR AB blood pressure management OR TI blood pressure control OR AB blood pressure control OR TI diabetes management OR AB diabetes management OR TI diabetes control OR AB diabetes control OR TI diabetic management OR AB diabetic management OR TI diabetic control OR AB diabetic control OR TI chronic condition management OR AB chronic condition management OR TI chronic illness management OR AB chronic illness management OR MH “Self-Management” OR TI self management OR AB self management OR TI self manages OR AB self manages OR TI self managed OR AB self managed OR TI self managing OR AB self managing) AND (MH “Medication Compliance” OR TI medication adherence OR AB medication adherence OR TI medication adherent OR AB medication adherent OR TI medication compliance OR AB medication compliance OR TI medication compliant OR AB medication compliant OR TI adherence to medication OR AB adherence to medication OR TI adherent to medication OR AB adherent to medication OR TI compliance to medication OR AB compliance to medication OR TI medication persistence OR AB medication persistence OR TI refill adherence OR AB refill adherence OR TI pharmaceutical adherence OR AB pharmaceutical adherence OR TI pharmaceutical compliance OR AB pharmaceutical compliance OR TI drug therapy compliance OR AB drug therapy compliance OR TI drug therapy adherence OR AB drug therapy adherence OR TI drug adherence OR AB drug adherence OR TI drug adherent OR AB drug adherent OR TI drug compliance OR AB drug compliance OR TI drug compliant OR AB drug compliant OR ((MH “Hypoglycemic Agents+” OR TI hypoglycemic agent OR AB hypoglycemic agent OR TI hypoglycemic agents OR AB hypoglycemic agents OR TI hypoglycemic drug OR AB hypoglycemic drug OR TI hypoglycemic drugs OR AB hypoglycemic drugs OR TI hypoglycemic medication OR AB hypoglycemic medication OR TI hypoglycemic medications OR AB hypoglycemic medications OR TI hypoglycemic prescription OR AB hypoglycemic prescription OR TI hypoglycemic prescriptions OR AB hypoglycemic prescriptions OR TI hypoglycemics OR AB hypoglycemics OR TI antihyperglycemic agent OR AB antihyperglycemic agent OR TI antihyperglycemic agents OR AB antihyperglycemic agents OR TI antihyperglycemic drug OR AB antihyperglycemic drug OR TI antihyperglycemic drugs OR AB antihyperglycemic drugs OR TI antihyperglycemic medication OR AB antihyperglycemic medication OR TI antihyperglycemic medications OR AB antihyperglycemic medications OR TI antihyperglycemic prescription OR AB antihyperglycemic prescription OR TI antihyperglycemic prescriptions OR AB antihyperglycemic prescriptions  OR TI antihyperglycemics AB antihyperglycemics OR TI anti-hyperglycemic agent OR AB anti-hyperglycemic agent OR TI anti-hyperglycemic agents OR AB anti-hyperglycemic agents OR TI anti-hyperglycemic drug OR AB anti-hyperglycemic drug OR TI anti-hyperglycemic drugs OR AB anti-hyperglycemic drugs OR TI anti-hyperglycemic medication OR AB anti-hyperglycemic medication OR TI anti-hyperglycemic medications OR AB anti-hyperglycemic medications OR TI anti-hyperglycemic prescription OR AB anti-hyperglycemic prescription OR TI anti-hyperglycemic prescriptions OR AB anti-hyperglycemic prescriptions OR TI anti-hyperglycemics AB anti-hyperglycemics OR TI antidiabetic agent OR AB antidiabetic agent OR TI antidiabetic agents OR AB antidiabetic agents OR TI antidiabetic drug OR AB antidiabetic drug OR TI antidiabetic drugs OR AB antidiabetic drugs OR TI antidiabetic medication OR AB antidiabetic medication OR TI antidiabetic medications OR AB antidiabetic medications OR TI antidiabetic prescription OR AB antidiabetic prescription OR TI antidiabetic prescriptions OR AB antidiabetic prescriptions OR TI antidiabetics OR AB antidiabetics OR TI anti-diabetic agent OR AB anti-diabetic agent OR TI anti-diabetic agents OR AB anti-diabetic agents OR TI anti-diabetic drug OR AB anti-diabetic drug OR TI anti-diabetic drugs OR AB anti-diabetic drugs OR TI anti-diabetic medication OR AB anti-diabetic medication OR TI anti-diabetic medications OR AB anti-diabetic medications OR TI anti-diabetic prescription OR AB anti-diabetic prescription OR TI anti-diabetic prescriptions OR AB anti-diabetic prescriptions OR TI anti-diabetics OR AB anti-diabetics OR MH “Antihypertensive Agents+” OR TI antihypertensive agent OR AB antihypertensive agent OR TI antihypertensive agents OR AB antihypertensive agents OR TI antihypertensive drug OR AB antihypertensive drug OR TI antihypertensive drugs OR AB antihypertensive drugs OR TI antihypertensive medication OR AB antihypertensive medication OR TI antihypertensive medications OR AB antihypertensive medications OR TI antihypertensive prescription OR AB antihypertensive prescription OR TI antihypertensive prescriptions OR AB antihypertensive prescriptions OR TI antihypertensives OR AB antihypertensives OR TI anti-hypertensive agent OR AB anti-hypertensive agent OR TI anti-hypertensive agents OR AB anti-hypertensive agents OR TI anti-hypertensive drug OR AB anti-hypertensive drug OR TI anti-hypertensive drugs OR AB anti-hypertensive drugs OR TI anti-hypertensive medication OR AB anti-hypertensive medication OR TI anti-hypertensive medications OR AB anti-hypertensive medications OR TI anti-hypertensive prescription OR AB anti-hypertensive prescription OR TI anti-hypertensive prescriptions OR AB anti-hypertensive prescriptions OR TI anti-hypertensives OR AB anti-hypertensives) AND (TI adherence OR AB adherence OR TI non-adherence OR AB non-adherence OR TI nonadherence OR AB nonadherence OR TI adherent OR AB adherent OR TI non-adherent OR AB non-adherent OR TI nonadherent OR AB nonadherent OR TI compliance OR AB compliance OR TI non-compliance OR AB non-compliance OR TI noncompliance OR AB noncompliance OR TI compliant OR AB compliant OR TI non-compliant OR AB non-compliant OR TI noncompliant OR AB noncompliant))) AND DT 20090101-20201231 AND LA English

**191** Results

Limited to publication dates 2009-2020

Limited to English

**Embase (OvidSP):** <https://ckm.vumc.org/ckm/diglib/ckmres.html?rid=197>

**Date Last Searched: 12/14/2020**

(exp minority group/ or exp minority health/ OR exp African American/ OR ("minority health" or "african american" or "african americans" or black or blacks or minority or minorities or race or racial or racially or ethnic or ethnically or ethnicity or underserved).ab,ti.) AND (exp diabetes mellitus/ OR exp hypertension/ OR exp kidney failure/ or exp end stage renal disease/ OR exp chronic kidney failure/ OR exp hemodialysis/ OR (diabetes or diabetic or diabetics or hypertension or hypertensive or "high blood pressure" or "high blood pressures" or ESRD or ESKD or "end stage renal disease" or "end stage renal diseases" or "end stage kidney disease" or "end stage kidney diseases" or "end stage renal failure" or "end stage renal insufficiency" or "end stage kidney failure" or "chronic kidney disease" or "chronic kidney diseases" or "chronic renal disease" or "chronic renal diseases" or "chronic kidney failure" or "chronic renal failure" or "chronic kidney insufficiency" or "chronic renal insufficiency" or "chronic renal insufficiencies" or "renal dialysis" or "renal dialyses" or "kidney dialysis" or "extracorporeal dialysis" or "extracorporeal dialyses" or hemodialysis or hemodialyses or haemodialysis or hemodialysis).ab,ti.) AND (("therapeutic alliance" or "therapeutic alliances" or "therapy alliance" or "therapy alliances" or "therapeutic relationship" or "therapeutic relationships" or "therapy relationship" or "therapy relationships" or "working alliance" or "working alliances").ab,ti. OR exp motivational interviewing/ OR ("motivational interviewing" or "motivational interview" or "motivational interviews" or "motivation interviewing" or "motivation interview" or "motivation interviews").ab,ti. OR ("social support" or "psychosocial support" or "psycho-social support" or "support system" or "support systems" or "family support" or "familial support" or "family member support" or "supportive family" or "supportive families" or "community support" or "supportive community" or "supportive communities" or "health system support").ab,ti. OR exp directive counseling/ OR ("directive counseling" or "directive counsel" or "prescriptive counseling").ab,ti. OR exp patient care/ OR ("patient care team" or "patient care teams" or "health care team" or "health care teams" or "healthcare team" or "healthcare teams" or "health team" or "health teams" or "medical care team" or "medical care teams" or multidisciplinary or multi-disciplinary or interdisciplinary or inter-disciplinary or multidisciplinary or multi-disciplinarity or interdisciplinarity or inter-disciplinarity or "team based" or "patient care management" or "patient management" or "care management" or "medication management" or "medication control" or "therapy management" or "therapy control" or "treatment management" or "treatment control" or "therapeutic management" or "therapeutic control" or "disease management" or "disease control" or "hypertension management" or "hypertension control" or "hypertensive management" or "hypertensive control" or "blood pressure management" or "blood pressure control" or "diabetes management" or "diabetes control" or "diabetic management" or "diabetic control" or "chronic condition management" or "chronic illness management" or "self management" or "self managed" or "self managing" or "self manages").ab,ti. OR exp self care/) AND (exp medication compliance/ OR ("medication adherence" or "medication adherent" or "medication compliance" or "medication compliant" or "adherence to medication" or "adherent to medication" or "compliance to medication" or "medication persistence" or "refill adherence" or "pharmaceutical adherence" or "pharmaceutical compliance" or "drug therapy adherence" or "drug therapy compliance" or "drug adherence" or "drug adherent" or "drug compliance" or "drug compliant").ab,ti. OR ((exp antidiabetic agent/ OR ("hypoglycemic agent" or "hypoglycemic agents" or "hypoglycemic drug" or "hypoglycemic drugs" or "hypoglycemic medication" or "hypoglycemic medications" or "hypoglycemic prescription" or "hypoglycemic prescriptions" or "hypoglycemics" or "antihyperglycemic agent" or "antihyperglycemic agents" or "antihyperglycemic drug" or "antihyperglycemic drugs" or "antihyperglycemic medication" or "antihyperglycemic medications" or "antihyperglycemic prescription" or "antihyperglycemic prescriptions" or "antihyperglycemics" or "anti-hyperglycemic agent" or "anti-hyperglycemic agents" or "anti-hyperglycemic drug" or "anti-hyperglycemic drugs" or "anti-hyperglycemic medication" or "anti-hyperglycemic medications" or "anti-hyperglycemic prescription" or "anti-hyperglycemic prescriptions" or "anti-hyperglycemics" or "antidiabetic agent" or "antidiabetic agents" or "antidiabetic drug" or "antidiabetic drugs" or "antidiabetic medication" or "antidiabetic medications" or "antidiabetic prescription" or "antidiabetic prescriptions" or "antidiabetics" or "anti-diabetic agent" or "anti-diabetic agents" or "anti-diabetic drug" or "anti-diabetic drugs" or "anti-diabetic medication" or "anti-diabetic medications" or "anti-diabetic prescription" or "anti-diabetic prescriptions" or "anti-diabetics").ab,ti. OR exp antihypertensive agent/ OR ("antihypertensive agent" or "antihypertensive agents" or "antihypertensive drug" or "antihypertensive drugs" or "antihypertensive medication" or "antihypertensive medications" or "antihypertensive prescription" or "antihypertensive prescriptions" or antihypertensives or "anti-hypertensive agent" or "anti-hypertensive agents" or "anti-hypertensive drug" or "anti-hypertensive drugs" or "anti-hypertensive medication" or "anti-hypertensive medications" or "anti-hypertensive prescription" or "anti-hypertensive prescriptions" or "anti-hypertensives").ab,ti.) AND (exp patient compliance/ OR (adherence or adherent or nonadherence or nonadherent or non-adherence or non-adherent or compliance or compliant or noncompliance or noncompliant or non-compliance or non-compliant).ab,ti.)))

898 Results

**438** Results: limit to English, limit to publication dates 2009-2020 and exclude Conference Abstracts

**PsycINFO (ProQuest):** <http://www.library.vanderbilt.edu/eres?id=143>

**Date Last Searched: 12/14/2020**

(TI(“minority health”) OR AB(“minority health”) OR MAINSUBJECT.EXACT.EXPLODE("Blacks") OR TI("African American") OR AB("African American") OR TI("African Americans") OR AB("African Americans") OR TI(black) OR AB(black) OR TI(blacks) OR AB(blacks) OR MAINSUBJECT.EXACT.EXPLODE("Minority Groups") OR TI(minority) OR AB(minority) OR TI(minorities) OR AB(minorities) OR MAINSUBJECT.EXACT.EXPLODE("Racial and Ethnic Differences") OR TI(race) OR AB(race) OR TI(racial) OR AB(racial) OR TI(racially) OR AB(racially) OR TI(ethnic) OR AB(ethnic) OR TI(ethnically) OR AB(ethnically) OR TI(ethnicity) OR AB(ethnicity) OR TI(underserved) OR AB(underserved)) AND (MAINSUBJECT.EXACT.EXPLODE("Diabetes") OR TI(diabetes) OR AB(diabetes) OR TI(diabetic) OR AB(diabetic) OR TI(diabetics) OR AB(diabetics) OR MAINSUBJECT.EXACT.EXPLODE("Hypertension") OR TI(hypertension) OR AB(hypertension) OR TI(hypertensive) OR AB(hypertensive) OR TI("high blood pressure") OR AB("high blood pressure") OR TI("high blood pressures") OR AB("high blood pressures") OR TI(ESRD) OR AB(ESRD) OR TI(ESKD) OR AB(ESKD) OR TI("end stage renal disease") OR AB("end stage renal disease") OR TI("end stage renal diseases") OR AB("end stage renal diseases") OR TI("end stage kidney disease") OR AB("end stage kidney disease") OR TI("end stage kidney diseases") OR AB("end stage kidney diseases") OR TI("end stage renal failure") OR AB("end stage renal failure") OR TI("end stage renal insufficiency") OR AB("end stage renal insufficiency") OR TI("end stage kidney failure") OR AB("end stage kidney failure") OR TI("chronic kidney disease") OR AB("chronic kidney disease”) OR TI("chronic kidney diseases") OR AB("chronic kidney diseases") OR TI("chronic renal disease") OR AB("chronic renal disease") OR TI("chronic renal diseases") OR AB("chronic renal diseases") OR TI("chronic kidney failure") OR AB("chronic kidney failure") OR TI("chronic renal failure") OR AB("chronic renal failure") OR TI("chronic kidney insufficiency") OR AB("chronic kidney insufficiency") OR TI("chronic renal insufficiency") OR AB("chronic renal insufficiency") OR TI("chronic renal insufficiencies") OR AB("chronic renal insufficiencies") OR MAINSUBJECT.EXACT.EXPLODE("Hemodialysis") OR TI("renal dialysis") OR AB("renal dialysis") OR TI("renal dialyses") OR AB("renal dialyses") OR TI("kidney dialysis") OR AB("kidney dialysis") OR TI("extracorporeal dialysis") OR AB("extracorporeal dialysis") OR TI("extracorporeal dialyses") OR AB("extracorporeal dialyses") OR TI(hemodialysis) OR AB(hemodialysis) OR TI(hemodialyses) OR AB(hemodialyses) OR TI(haemodialysis) OR AB(haemodialysis) OR TI(hemodialysis) OR AB(hemodialysis)) AND (MAINSUBJECT.EXACT.EXPLODE("Therapeutic Alliance") OR TI("therapeutic alliance") OR AB("therapeutic alliance") OR TI("therapeutic alliances") OR AB("therapeutic alliances") OR TI("therapy alliance") OR AB("therapy alliance") OR TI("therapy alliances") OR AB("therapy alliances") OR TI("therapeutic relationship") OR AB("therapeutic relationship") OR TI("therapeutic relationships") OR AB("therapeutic relationships") OR TI("therapy relationship") OR AB("therapy relationship") OR TI("therapy relationships") OR AB("therapy relationships") OR TI("working alliance") OR AB("working alliance") OR TI("working alliances") OR AB("working alliances") OR MAINSUBJECT.EXACT.EXPLODE("Motivational Interviewing") OR TI("motivational interviewing") OR AB("motivational interviewing") OR TI("motivational interview") OR AB("motivational interview") OR TI("motivational interviews") OR AB("motivational interviews") OR TI("motivation interviewing") OR AB("motivation interviewing") OR TI("motivation interview") OR AB("motivation interview") OR TI("motivation interviews") OR AB("motivation interviews") OR MAINSUBJECT.EXACT.EXPLODE("Social Support") OR TI("social support") OR AB("social support") OR TI(“psychosocial support”) OR AB(“psychosocial support”) OR TI(“psycho-social support”) OR AB(“psycho-social support”) OR TI("support system") OR AB("support system") OR TI("support systems") OR AB("support systems") OR TI("family support") OR AB("family support") OR TI("familial support") OR AB("familial support") OR TI("family member support") OR AB("family member support") OR TI("supportive family") OR AB("supportive family") OR TI("supportive families") OR AB("supportive families") OR TI("community support") OR AB("community support") OR TI("supportive community") OR AB("supportive community") OR TI("supportive communities") OR AB("supportive communities") OR TI("health system support") OR AB("health system support") OR TI("directive counseling") OR AB("directive counseling") OR TI("directive counsel") OR AB("directive counsel") OR TI("prescriptive counseling") OR AB("prescriptive counseling") OR TI("patient care team") OR AB("patient care team") OR TI("patient care teams") OR AB("patient care teams") OR TI("health care team") OR AB("health care team") OR TI("health care teams") OR AB("health care teams") OR TI("healthcare team") OR AB("healthcare team") OR TI("healthcare teams") OR AB("healthcare teams") OR TI("health team") OR AB("health team") OR TI("health teams") OR AB("health teams") OR TI("medical care team") OR AB("medical care team") OR TI("medical care teams") OR AB("medical care teams") OR TI(multidisciplinary) OR AB(multidisciplinary) OR TI(multi-disciplinary) OR AB(multi-disciplinary) OR TI(interdisciplinary) OR AB(interdisciplinary) OR TI(inter-disciplinary) OR AB(inter-disciplinary) OR TI(multidisciplinary) OR AB(multidisciplinary) OR TI(multi-disciplinarity) OR AB(mutli-disciplinarity) OR TI(interdisciplinarity) OR AB(interdisciplinarity) OR TI(inter-disciplinarity) OR AB(inter-disciplinarity) TI("team based") OR AB("team based") OR MAINSUBJECT.EXACT.EXPLODE("Treatment Planning") OR TI("patient care management") OR AB("patient care management") OR TI("care management") OR AB("care management") OR TI("medication management") OR AB("medication management") OR TI("medication control") OR AB("medication control") OR TI("therapy management") OR AB("therapy management") OR TI("therapy control") OR AB("therapy control") OR TI("treatment management") OR AB("treatment management") OR TI("treatment control") OR AB("treatment control") OR TI("therapeutic management") OR AB("therapeutic management") OR TI("therapeutic control") OR AB("therapeutic control") OR TI("disease management") OR AB("disease management") OR TI("disease control") OR AB("disease control") OR TI("hypertension management") OR AB("hypertension management") OR TI("hypertension control") OR AB("hypertension control") OR TI("hypertensive management") OR AB("hypertensive management") OR TI("hypertensive control") OR AB("hypertensive control") OR TI("blood pressure management") OR AB("blood pressure management") OR TI("blood pressure control") OR AB("blood pressure control") OR TI("diabetes management") OR AB("diabetes management") OR TI("diabetes control") OR AB("diabetes control") OR TI("diabetic management") OR AB("diabetic management") OR TI("diabetic control") OR AB("diabetic control") OR TI("chronic condition management") OR AB("chronic condition management") OR TI("chronic illness management") OR AB("chronic illness management") OR MAINSUBJECT.EXACT.EXPLODE("Self-Management") OR TI("self management") OR AB("self management") OR TI("self managed") OR AB("self managed") OR TI("self managing") OR AB("self managing") OR TI("self manages") OR AB("self manages")) AND (TI("medication adherence") OR AB("medication adherence") OR TI("medication adherent") OR AB("medication adherent") OR TI("medication compliance") OR AB("medication compliance") OR TI("medication compliant") OR AB("medication compliant") OR TI("adherence to medication") OR AB("adherence to medication") OR TI("adherent to medication") OR AB("adherent to medication") OR TI("compliance to medication") OR AB("compliance to medication") OR TI("compliant to medication") OR AB("compliant to medication") OR TI("medication persistence") OR AB("medication persistence") OR TI("refill adherence") OR AB("refill adherence") OR TI("pharmaceutical adherence") OR AB("pharmaceutical adherence") OR TI("pharmaceutical compliance") OR AB("pharmaceutical compliance") OR TI("drug therapy adherence") OR AB("drug therapy adherence") OR TI("drug therapy compliance") OR AB("drug therapy compliance") OR TI(“drug adherence”) OR AB(“drug adherence”) OR TI(“drug adherent”) OR AB(“drug adherent”) OR TI(“drug compliance”) OR AB(“drug compliance”) OR TI(“drug compliant”) OR AB(“drug compliant”) OR ((TI("hypoglycemic agent") OR AB("hypoglycemic agent") OR TI("hypoglycemic agents") OR AB("hypoglycemic agents") OR TI("hypoglycemic drug") OR AB("hypoglycemic drug") OR TI("hypoglycemic drugs") OR AB("hypoglycemic drugs") OR TI("hypoglycemic medication") OR AB("hypoglycemic medication") OR TI("hypoglycemic medications") OR AB("hypoglycemic medications") OR TI("hypoglycemic prescription") OR AB("hypoglycemic prescriptions") OR TI(hypoglycemics) OR AB(hypoglycemics) OR TI("antihyperglycemic agent") OR AB("antihyperglycemic agent") OR TI("antihyperglycemic agents") OR AB("antihyperglycemic agents") OR TI("antihyperglycemic drug") OR AB("antihyperglycemic drug") OR TI("antihyperglycemic drugs") OR AB("antihyperglycemic drugs") OR TI("antihyperglycemic medication") OR AB("antihyperglycemic medication") OR TI(“antihyperglycemic medications”) OR AB(“antihyperglycemic medications”) OR TI("antihyperglycemic prescription") OR AB("antihyperglycemic prescription") OR TI("antihyperglycemic prescriptions") OR AB("antihyperglycemic prescriptions") OR TI(antihyperglycemics) OR AB(antihyperglycemics) OR TI("anti-hyperglycemic agent") OR AB("anti-hyperglycemic agent") OR TI("anti-hyperglycemic agents") OR AB("anti-hyperglycemic agents") OR TI("anti-hyperglycemic drug") OR AB("anti-hyperglycemic drug") OR TI("anti-hyperglycemic drugs") OR AB("anti-hyperglycemic drugs") OR TI("anti-hyperglycemic medication") OR AB("anti-hyperglycemic medication") OR TI(“anti-hyperglycemic medications”) OR AB(“anti-hyperglycemic medications”) OR TI("anti-hyperglycemic prescription") OR AB("anti-hyperglycemic prescription") OR TI("anti-hyperglycemic prescriptions") OR AB("anti-hyperglycemic prescriptions") OR TI(anti-hyperglycemics) OR AB(anti-hyperglycemics) OR TI("antidiabetic agent") OR AB("antidiabetic agent") OR TI("antidiabetic agents") OR AB("antidiabetic agents") OR TI("antidiabetic drug") OR AB("antidiabetic drug") OR TI("antidiabetic drugs") OR AB("antidiabetic drugs") OR TI("antidiabetic medication") OR AB("antidiabetic medication") OR TI("antidiabetic medications") OR AB("antidiabetic medications") OR TI(“antidiabetic prescription”) OR AB(“antidiabetic prescription”) OR TI(“antidiabetic prescriptions”) OR AB(“antidiabetic prescriptions”) OR TI(antidiabetics) OR AB(antidiabetics) OR TI("anti-diabetic agent") OR AB("anti-diabetic agent") OR TI("anti-diabetic agents") OR AB("anti-diabetic agents") OR TI("anti-diabetic drug") OR AB("anti-diabetic drug") OR TI("anti-diabetic drugs") OR AB("anti-diabetic drugs") OR TI("anti-diabetic medication") OR AB("anti-diabetic medication") OR TI("anti-diabetic medications") OR AB("anti-diabetic medications") OR TI(“anti-diabetic prescription”) OR AB(“anti-diabetic prescription”) OR TI(“anti-diabetic prescriptions”) OR AB(“anti-diabetic prescriptions”) OR TI(anti-diabetics) OR AB(anti-diabetics) OR MAINSUBJECT.EXACT.EXPLODE("Antihypertensive Drugs") OR TI("antihypertensive agent") OR AB("antihypertensive agent") OR TI("antihypertensive agents") OR AB("antihypertensive agents") OR TI("antihypertensive drug") OR AB("antihypertensive drug") OR TI("antihypertensive drugs") OR AB("antihypertensive drugs") OR TI("antihypertensive medication") OR AB("antihypertensive medication") OR TI("antihypertensive medications") OR AB("antihypertensive medications") OR TI("antihypertensive prescription") OR AB("antihypertensive prescription") OR TI("antihypertensive prescriptions") OR AB("antihypertensive prescriptions") OR TI(antihypertensives) OR AB(antihypertensives) OR TI("anti-hypertensive agent") OR AB("anti-hypertensive agent") OR TI("anti-hypertensive agents") OR AB("anti-hypertensive agents") OR TI("anti-hypertensive drug") OR AB("anti-hypertensive drug") OR TI("anti-hypertensive drugs") OR AB("anti-hypertensive drugs") OR TI("anti-hypertensive medication") OR AB("anti-hypertensive medication") OR TI("anti-hypertensive medications") OR AB(“anti-hypertensive medications”) OR TI("anti-hypertensive prescription") OR AB("anti-hypertensive prescription") OR TI("anti-hypertensive prescriptions") OR AB("anti-hypertensive prescriptions") OR TI(anti-hypertensives) OR AB(anti-hypertensives)) AND (MAINSUBJECT.EXACT.EXPLODE("Treatment Compliance") OR TI(adherence) OR AB(adherence) OR TI(adherent) OR AB(adherent) OR TI(nonadherence) OR AB(nonadherence) OR TI(nonadherent) OR AB(nonadherent) OR TI(non-adherence) OR AB(non-adherence) OR TI(non-adherent) OR AB(non-adherent) OR TI(compliance) OR AB(compliance) OR TI(compliant) OR AB(compliant) OR TI(noncompliance) OR AB(noncompliance) OR TI(noncompliant) OR AB(noncompliant) OR TI(non-compliance) OR AB(non-compliance) OR TI(non-compliant) OR AB(non-compliant)))) AND PD(20090101-20201231) AND LA(English)

**61** Results

Limited to publication dates 2009-2020

Limited to English

**PubMed (or MEDLINE (via PubMed)):** <http://www.library.vanderbilt.edu/eres?id=145>

**Date Last Searched: 5/25/2022**

("Minority Health"[Mesh] OR "minority health"[tiab] OR "African Americans"[Mesh] OR "African Americans"[tiab] OR "African American"[tiab] OR black[tiab] OR blacks[tiab] OR "Minority Groups"[Mesh] OR minority[tiab] OR minorities[tiab] OR "Race Factors"[Mesh] OR race[tiab] OR racial[tiab] OR racially[tiab] OR ethnic[tiab] OR ethnically[tiab] OR ethnicity[tiab] OR underserved[tiab]) AND ("Diabetes Mellitus"[Mesh] OR diabetes[tiab] OR diabetic[tiab] OR diabetics[tiab] OR "Hypertension"[Mesh] OR hypertension[tiab] OR hypertensive[tiab] OR "high blood pressure"[tiab] OR "high blood pressures"[tiab] OR "Kidney Failure, Chronic"[Mesh] OR ESRD[tiab] OR ESKD[tiab] OR "end stage renal disease"[tiab] OR "end stage renal diseases"[tiab] OR "end stage kidney disease"[tiab] OR "end stage kidney diseases"[tiab] OR "end stage renal failure"[tiab] OR "end stage renal insufficiency"[tiab] OR "end stage kidney failure"[tiab] OR "Renal Insufficiency, Chronic"[Mesh] OR "chronic kidney disease"[tiab] OR "chronic kidney diseases"[tiab] OR "chronic renal disease"[tiab] OR "chronic renal diseases"[tiab] OR "chronic kidney failure"[tiab] OR "chronic renal failure"[tiab] OR "chronic kidney insufficiency"[tiab] OR "chronic renal insufficiency"[tiab] OR "chronic renal insufficiencies"[tiab] OR "Renal Dialysis"[Mesh] OR "renal dialysis"[tiab] OR "renal dialyses"[tiab] OR "kidney dialysis"[tiab] OR "extracorporeal dialysis"[tiab] OR "extracorporeal dialyses"[tiab] OR hemodialysis[tiab] OR hemodialyses[tiab] OR haemodialysis[tiab] OR haemodialyses[tiab]) AND ("Therapeutic Alliance"[Mesh] OR "therapeutic alliance"[tiab] OR "therapeutic alliances"[tiab] OR "therapy alliance"[tiab] OR "therapy alliances"[tiab] OR "therapeutic relationship"[tiab] OR "therapeutic relationships"[tiab] OR "therapy relationship"[tiab] OR "therapy relationships"[tiab] OR "working alliance"[tiab] OR "working alliances"[tiab] OR "Motivational Interviewing"[Mesh] OR "motivational interviewing"[tiab] OR "motivational interview"[tiab] OR "motivational interviews"[tiab] OR "motivation interviewing"[tiab] OR "motivation interview"[tiab] OR "Social Support"[Mesh] OR "social support"[tiab] OR "support system"[tiab] OR "support systems"[tiab] OR "family support"[tiab] OR "familial support"[tiab] OR "family member support"[tiab] OR "supportive family"[tiab] OR "supportive families"[tiab] OR "community support"[tiab] OR "supportive community"[tiab] OR "supportive communities"[tiab] OR "health system support"[tiab] OR "Directive Counseling"[Mesh] OR "directive counseling"[tiab] OR "directive counsel"[tiab] OR "prescriptive counseling"[tiab] OR "Patient Care Team"[Mesh] OR "patient care team"[tiab] OR "patient care teams"[tiab] OR "health care team"[tiab] OR "health care teams"[tiab] OR "healthcare team"[tiab] OR "healthcare teams"[tiab] OR "health team"[tiab] OR "health teams"[tiab] OR "medical care team"[tiab] OR "medical care teams"[tiab] OR multidisciplinary[tiab] OR multi-disciplinary[tiab] OR interdisciplinary[tiab] OR inter-disciplinary[tiab] OR multidisciplinarity[tiab] OR multi-disciplinarity[tiab] OR interdisciplinarity[tiab] OR inter-disciplinarity[tiab] OR "team based"[tiab] OR "Patient Care Management"[Mesh] OR "patient care management"[tiab] OR "patient management"[tiab] OR "care management"[tiab] OR "medication management"[tiab] OR "medication control"[tiab] OR "therapy management"[tiab] OR "therapy control"[tiab] OR "treatment management"[tiab] OR "treatment control"[tiab] OR "therapeutic management"[tiab] OR "therapeutic control"[tiab] OR "disease management"[tiab] OR "disease control"[tiab] OR "hypertension management"[tiab] OR "hypertension control"[tiab] OR "hypertensive management"[tiab] OR "hypertensive control"[tiab] OR "blood pressure management"[tiab] OR "blood pressure control"[tiab] OR "diabetes management"[tiab] OR "diabetes control"[tiab] OR "diabetic management"[tiab] OR "diabetic control"[tiab] OR "chronic condition management"[tiab] OR "chronic illness management"[tiab] OR “Self-Management”[Mesh] OR "self management"[tiab] OR "self managed"[tiab] OR "self managing"[tiab] OR "self manages"[tiab]) AND ("Medication Adherence"[Mesh] OR "medication adherence"[tiab] OR "medication adherent"[tiab] OR "medication compliance"[tiab] OR "medication compliant"[tiab] OR "adherence to medication"[tiab] OR "adherent to medication"[tiab] OR "compliance to medication"[tiab] OR "medication persistence"[tiab] OR "refill adherence"[tiab] OR "pharmaceutical adherence"[tiab] OR "pharmaceutical compliance"[tiab] OR "drug therapy compliance"[tiab] OR "drug therapy adherence"[tiab] OR (("Hypoglycemic Agents"[Mesh] OR "hypoglycemic agent"[tiab] OR "hypoglycemic agents"[tiab] OR "hypoglycemic drug"[tiab] OR "hypoglycemic drugs"[tiab] OR "hypoglycemic medication"[tiab] OR "hypoglycemic medications"[tiab] OR "hypoglycemic prescription"[tiab] OR hypoglycemics[tiab] OR "antihyperglycemic agent"[tiab] OR "antihyperglycemic agents"[tiab] OR "antihyperglycemic drug"[tiab] OR "antihyperglycemic drugs"[tiab] OR "antihyperglycemic medication"[tiab] OR "antihyperglycemic medications"[tiab] OR "antihyperglycemic prescription"[tiab] OR antihyperglycemics[tiab] OR "anti-hyperglycemic agent"[tiab] OR "anti-hyperglycemic agents"[tiab] OR "anti-hyperglycemic drug"[tiab] OR "anti-hyperglycemic drugs"[tiab] OR "anti-hyperglycemic medication"[tiab] OR "anti-hyperglycemic medications"[tiab] OR anti-hyperglycemics[tiab] OR "antidiabetic agent"[tiab] OR "antidiabetic agents"[tiab] OR "antidiabetic drug"[tiab] OR "antidiabetic drugs"[tiab] OR "antidiabetic medication"[tiab] OR "antidiabetic medications"[tiab] OR "antidiabetic prescription"[tiab] OR "antidiabetic prescriptions"[tiab] OR antidiabetics[tiab] OR "anti-diabetic agent"[tiab] OR "anti-diabetic agents"[tiab] OR "anti-diabetic drug"[tiab] OR "anti-diabetic drugs"[tiab] OR "anti-diabetic medication"[tiab] OR "anti-diabetic medications"[tiab] OR "anti-diabetic prescription"[tiab] OR "anti-diabetic prescriptions"[tiab] OR anti-diabetics[tiab] OR "Antihypertensive Agents"[Mesh] OR "antihypertensive agent"[tiab] OR "antihypertensive agents"[tiab] OR "antihypertensive drug"[tiab] OR "antihypertensive drugs"[tiab] OR "antihypertensive medication"[tiab] OR "antihypertensive medications"[tiab] OR "antihypertensive prescription"[tiab] OR "antihypertensive prescriptions"[tiab] OR antihypertensives[tiab] OR "anti hypertensive agent"[tiab] OR "anti hypertensive agents"[tiab] OR "anti hypertensive drug"[tiab] OR "anti hypertensive drugs"[tiab] OR "anti hypertensive medication"[tiab] OR "anti hypertensive medications"[tiab] OR "anti hypertensives"[tiab]) AND ("Treatment Adherence and Compliance"[Mesh] OR adherence[tiab] OR "non-adherence"[tiab] OR nonadherence[tiab] OR adherent[tiab] OR "non-adherent"[tiab] OR nonadherent[tiab] OR compliance[tiab] OR "non-compliance"[tiab] OR noncompliance[tiab] OR compliant[tiab] OR "non-compliant"[tiab] OR noncompliant[tiab]))) AND (English[lang]) AND (("2021/01/01"[CRDT] : "2022/05/25"[CRDT]) OR ("2021/01/01"[EDAT] : "2022/05/25"[EDAT]) OR ("2021/01/01"[MHDA] : "2022/05/25"[MHDA]))

**78** Results

Limited to English

Limited to entry dates 1/1/2021 - 5/25/2022

**CINAHL (EBSCOhost):** <http://www.library.vanderbilt.edu/eres?id=29>

**Date Last Searched: 5/25/2022**

(MH “Blacks” OR TI “minority health” OR AB “minority health” OR TI “African American” OR AB “African American” OR TI “African Americans” OR AB “African Americans” OR TI black OR AB black OR TI blacks OR AB blacks OR MH “Minority Groups” OR TI minority OR AB minority OR TI minorities OR AB minorities OR MH “Race Factors” OR TI race OR AB race OR TI racial OR AB racial OR TI racially OR AB racially OR TI ethnic OR AB ethnic OR TI ethnically OR AB ethnically OR TI ethnicity OR AB ethnicity OR TI underserved OR AB underserved) AND (MH “Diabetes Mellitus+” OR TI diabetes OR AB diabetes OR TI diabetic OR AB diabetic OR TI diabetics OR AB diabetics OR MH “Hypertension+” OR TI hypertension OR AB hypertension OR TI hypertensive” OR AB hypertensive OR TI “high blood pressure” OR AB “high blood pressure” OR TI “high blood pressures” OR AB “high blood pressures” OR MH “Kidney Failure, Chronic+” OR TI ESRD OR AB ESRD OR TI ESKD OR AB ESKD OR TI “end stage renal disease” OR AB “end stage renal disease” OR TI “end stage renal diseases” OR AB “end stage renal diseases” OR TI “end stage kidney disease” OR AB “end stage kidney disease” OR TI “end stage kidney diseases” OR AB “end stage kidney diseases” OR TI “end stage renal failure” OR AB “end stage renal failure” OR TI “end stage kidney failure” OR AB “end stage kidney failure” OR MH “Renal Insufficiency, Chronic+” OR TI “chronic kidney disease” OR AB “chronic kidney disease” OR TI “chronic kidney diseases” OR AB “chronic kidney diseases” OR TI “chronic renal disease” OR AB “chronic renal disease” OR TI “chronic renal diseases” OR AB “chronic renal diseases” OR TI “chronic kidney failure” OR AB “chronic kidney failure” OR TI “chronic renal failure” OR AB “chronic renal failure” OR TI “chronic kidney insufficiency” OR AB “chronic kidney insufficiency” OR TI “chronic renal insufficiency” OR AB “chronic renal insufficiency” OR TI “chronic renal insufficiencies” OR AB “chronic renal insufficiencies” OR MH “Hemodialysis+” OR MH “Dialysis Patients” OR TI “renal dialysis” OR AB “renal dialysis” OR TI “renal dialyses” OR AB “renal dialyses” OR TI “kidney dialysis” OR AB “kidney dialysis” OR TI “extracorporeal dialysis” OR AB “extracorporeal dialysis” OR TI “extracorporeal dialyses” OR AB “extracorporeal dialyses” OR TI hemodialysis OR AB hemodialysis OR TI hemodialyses OR AB hemodialyses OR TI haemodialysis OR AB haemodialysis OR TI haemodialyses OR AB haemodialyses) AND (MH “Therapeutic Alliance” OR TI “therapeutic alliance” OR AB “therapeutic alliance” OR TI “therapeutic alliances” OR AB “therapeutic alliances” OR TI “therapy alliance” OR AB “therapy alliance” OR TI “therapy alliances” OR AB “therapy alliances” OR TI “therapeutic relationship” OR AB “therapeutic relationship” OR TI “therapeutic relationships” OR AB “therapeutic relationships” OR TI “therapy relationship” OR AB “therapy relationship” OR TI “therapy relationships” OR AB “therapy relationships” OR TI “working alliance” OR AB “working alliance” OR TI “working alliances” OR AB “working alliances” OR MH “Motivational Interviewing” OR TI “motivational interviewing” OR AB “motivational interviewing” OR TI “motivational interview” OR AB “motivational interview” OR TI “motivational interviews” OR AB “motivational interviews” OR TI “motivation interviewing” OR AB “motivation interviewing” OR TI “motivation interview” OR AB “motivation interview” OR TI “motivation interviews” OR AB “motivation interviews” OR MH “Support, Psychosocial+” OR TI “social support” OR AB “social support” OR TI “support system” OR AB “support system” OR TI “support systems” OR AB “support systems” OR TI “family support” OR AB “family support” OR TI “familial support” OR AB “familial support” OR TI “family member support” OR AB “family member support” OR TI “supportive family” OR AB “supportive family” OR TI “supportive families” OR AB “supportive families” OR TI “community support” OR AB “community support” OR TI “supportive community” OR AB “supportive community” OR TI “supportive communities” OR AB “supportive communities” OR TI “health system support” OR AB “health system support” OR TI “directive counseling” OR AB “directive counseling” OR TI “directive counsel” OR AB “directive counsel” OR TI “prescriptive counseling” OR AB “prescriptive counseling” OR MH “Multidisciplinary Care Team+” OR TI “patient care team” OR AB “patient care team” OR TI “patient care teams” OR AB “patient care teams” OR TI “health care team” OR AB “health care team” OR TI “health care teams” OR AB “health care teams” OR TI “healthcare team” OR AB “healthcare team” OR TI “healthcare teams” OR AB “healthcare teams” OR TI “health team” OR AB “health team” OR TI “health teams” OR AB “health teams” OR TI “medical care team” OR AB “medical care team” OR TI “medical care teams” OR AB “medical care teams” OR TI multidisciplinary OR AB multidisciplinary OR TI multi-disciplinary OR AB multi-disciplinary OR TI interdisciplinary OR AB interdisciplinary OR TI inter-disciplinary OR AB inter-disciplinary OR TI multidiscinplinarity OR AB multidisciplinarity OR TI multi-disciplinarity OR AB multi-disciplinarity OR TI interdisciplinarity OR AB interdisciplinarity OR TI inter-disciplinarity OR AB inter-disciplinarity OR TI “team based” OR TI “patient care management” OR AB “patient care management” OR TI “patient management” OR AB “patient management” OR TI “care management” OR AB “care management” OR TI “medication management” OR AB “medication management” OR TI “medication control” OR AB “medication control” OR TI “therapy management” OR AB “therapy management” OR TI “therapy control” OR AB “therapy control” OR TI “treatment management” OR AB “treatment management” OR TI “treatment control” OR AB “treatment control” OR TI “therapeutic management” OR AB “therapeutic management” OR TI “therapeutic control” OR AB “therapeutic control” OR MH “Disease Management+” OR TI “disease management” OR AB “disease management” OR TI “disease control” OR AB “disease control” OR TI “hypertension management” OR AB “hypertension management” OR TI “hypertension control” OR AB “hypertension control” OR TI “hypertensive management” OR AB “hypertensive management” OR TI “hypertensive control” OR AB “hypertensive control” OR TI “blood pressure management” OR AB “blood pressure management” OR TI “blood pressure control” OR AB “blood pressure control” OR TI “diabetes management” OR AB “diabetes management” OR TI “diabetes control” OR AB “diabetes control” OR TI “diabetic management” OR AB “diabetic management” OR TI “diabetic control” OR AB “diabetic control” OR TI “chronic condition management” OR AB “chronic condition management” OR TI “chronic illness management” OR AB “chronic illness management” OR MH “Self-Management” OR TI “self management” OR AB “self management” OR TI “self manages” OR AB “self manages” OR TI “self managed” OR AB “self managed” OR TI “self managing” OR AB “self managing) AND (MH “Medication Compliance” OR TI “medication adherence” OR AB “medication adherence” OR TI “medication adherent” OR AB “medication adherent” OR TI “medication compliance” OR AB “medication compliant” OR TI “adherence to medication” OR AB “adherence to medication” OR TI “adherent to medication” OR AB “adherent to medication” OR TI “compliance to medication” OR AB “compliance to medication” OR TI “medication persistence” OR AB “medication persistence” OR TI “refill adherence” OR AB “refill adherence” OR TI “pharmaceutical adherence” OR AB “pharmaceutical adherence” OR TI “pharmaceutical compliance” OR AB “pharmaceutical compliance” OR TI “drug therapy compliance” OR AB “drug therapy compliance” OR TI “drug therapy adherence” OR AB “drug therapy adherence” OR ((MH “Hypoglycemic Agents+” OR TI “hypoglycemic agent” OR AB “hypoglycemic agent” OR TI “hypoglycemic agents” OR AB “hypoglycemic agents” OR TI “hypoglycemic drug” OR AB “hypoglycemic drug” OR TI “hypoglycemic drugs” OR AB “hypoglycemic drugs” OR TI “hypoglycemic medication” OR AB “hypoglycemic medication” OR TI “hypoglycemic medications” OR AB “hypoglycemic medications” OR TI “hypoglycemic prescription” OR AB “hypoglycemic prescription” OR TI “hypoglycemic prescriptions” OR AB “hypoglycemic prescriptions” OR TI hypoglycemics OR AB hypoglycemics OR TI antihyperglycemic agent” OR AB “antihyperglycemic agent” OR TI “antihyperglycemic agents” OR AB “antihyperglycemic agents” OR TI “antihyperglycemic drug” OR AB “antihyperglycemic drug” OR TI “antihyperglycemic drugs” OR AB “antihyperglycemic drugs” OR TI “antihyperglycemic medication” OR AB “antihyperglycemic medication” OR TI “antihyperglycemic medications” OR AB “antihyperglycemic medications” OR TI “antihyperglycemic prescription” OR AB “antihyperglycemic prescription” OR TI “antihyperglycemic prescriptions” OR AB “antihyperglycemic prescriptions”  OR TI antihyperglycemics AB antihyperglycemics OR TI anti-hyperglycemic agent” OR AB “anti-hyperglycemic agent” OR TI “anti-hyperglycemic agents” OR AB “anti-hyperglycemic agents” OR TI “anti-hyperglycemic drug” OR AB “anti-hyperglycemic drug” OR TI “anti-hyperglycemic drugs” OR AB “anti-hyperglycemic drugs” OR TI “anti-hyperglycemic medication” OR AB “anti-hyperglycemic medication” OR TI “anti-hyperglycemic medications” OR AB “anti-hyperglycemic medications” OR TI “anti-hyperglycemic prescription” OR AB “anti-hyperglycemic prescription” OR TI “anti-hyperglycemic prescriptions” OR AB “anti-hyperglycemic prescriptions” OR TI anti-hyperglycemics AB anti-hyperglycemics OR TI “antidiabetic agent” OR AB “antidiabetic agent” OR TI “antidiabetic agents” OR AB “antidiabetic agents” OR TI “antidiabetic drug” OR AB “antidiabetic drug” OR TI “antidiabetic drugs” OR AB “antidiabetic drugs” OR TI “antidiabetic medication” OR AB “antidiabetic medication” OR TI “antidiabetic medications” OR AB “antidiabetic medications” OR TI “antidiabetic prescription” OR AB “antidiabetic prescription” OR TI “antidiabetic prescriptions” OR AB “antidiabetic prescriptions” OR TI antidiabetics OR AB antidiabetics OR TI “anti-diabetic agent” OR AB “anti-diabetic agent” OR TI “anti-diabetic agents” OR AB “anti-diabetic agents” OR TI “anti-diabetic drug” OR AB “anti-diabetic drug” OR TI “anti-diabetic drugs” OR AB “anti-diabetic drugs” OR TI “anti-diabetic medication” OR AB “anti-diabetic medication” OR TI “anti-diabetic medications” OR AB “anti-diabetic medications” OR TI “anti-diabetic prescription” OR AB “anti-diabetic prescription” OR TI “anti-diabetic prescriptions” OR AB “anti-diabetic prescriptions” OR TI anti-diabetics OR AB anti-diabetics OR MH “Antihypertensive Agents+” OR TI “antihypertensive agent” OR AB “antihypertensive agent” OR TI “antihypertensive agents” OR AB “antihypertensive agents” OR TI “antihypertensive drug” OR AB “antihypertensive drug” OR TI “antihypertensive drugs” OR AB “antihypertensive drugs” OR TI “antihypertensive medication” OR AB “antihypertensive medication” OR TI “antihypertensive medications” OR AB “antihypertensive medications” OR TI “antihypertensive prescription” OR AB “antihypertensive prescription” OR TI “antihypertensive prescriptions” OR AB “antihypertensive prescriptions” OR TI antihypertensives OR AB antihypertensives OR TI “anti-hypertensive agent” OR AB “anti-hypertensive agent” OR TI “anti-hypertensive agents” OR AB “anti-hypertensive agents” OR TI “anti-hypertensive drug” OR AB “anti-hypertensive drug” OR TI “anti-hypertensive drugs” OR AB “anti-hypertensive drugs” OR TI “anti-hypertensive medication” OR AB “anti-hypertensive medication” OR TI “anti-hypertensive medications” OR AB “anti-hypertensive medications” OR TI “anti-hypertensive prescription” OR AB “anti-hypertensive prescription” OR TI “anti-hypertensive prescriptions” OR AB “anti-hypertensive prescriptions” OR TI anti-hypertensives OR AB anti-hypertensives) AND (TI adherence OR AB adherence OR TI non-adherence OR AB non-adherence OR TI nonadherence OR AB nonadherence OR TI adherent OR AB adherent OR TI non-adherent OR AB non-adherent OR TI nonadherent OR AB nonadherent OR TI compliance OR AB compliance OR TI non-compliance OR AB non-compliance OR TI noncompliance OR AB noncompliance OR TI compliant OR AB compliant OR TI non-compliant OR AB non-compliant OR TI noncompliant OR AB noncompliant))) AND EM 20210101-20220525 AND LA English

**60** Results

Limited to entry dates 1/1/2021 - 5/25/2022

Limited to English

**Embase (OvidSP):** <https://ckm.vumc.org/ckm/diglib/ckmres.html?rid=197>

**Date Last Searched: 5/25/2022**

(exp minority group/ or exp minority health/ OR exp African American/ OR ("minority health" or "african american" or "african americans" or black or blacks or minority or minorities or race or racial or racially or ethnic or ethnically or ethnicity or underserved).ab,ti.) AND (exp diabetes mellitus/ OR exp hypertension/ OR exp kidney failure/ or exp end stage renal disease/ OR exp chronic kidney failure/ OR exp hemodialysis/ OR (diabetes or diabetic or diabetics or hypertension or hypertensive or "high blood pressure" or "high blood pressures" or ESRD or ESKD or "end stage renal disease" or "end stage renal diseases" or "end stage kidney disease" or "end stage kidney diseases" or "end stage renal failure" or "end stage renal insufficiency" or "end stage kidney failure" or "chronic kidney disease" or "chronic kidney diseases" or "chronic renal disease" or "chronic renal diseases" or "chronic kidney failure" or "chronic renal failure" or "chronic kidney insufficiency" or "chronic renal insufficiency" or "chronic renal insufficiencies" or "renal dialysis" or "renal dialyses" or "kidney dialysis" or "extracorporeal dialysis" or "extracorporeal dialyses" or hemodialysis or hemodialyses or haemodialysis or haemodialyses).ab,ti.) AND (("therapeutic alliance" or "therapeutic alliances" or "therapy alliance" or "therapy alliances" or "therapeutic relationship" or "therapeutic relationships" or "therapy relationship" or "therapy relationships" or "working alliance" or "working alliances").ab,ti. OR exp motivational interviewing/ OR ("motivational interviewing" or "motivational interview" or "motivational interviews" or "motivation interviewing" or "motivation interview" or "motivation interviews").ab,ti. OR ("social support" or "psychosocial support" or "psycho-social support" or "support system" or "support systems" or "family support" or "familial support" or "family member support" or "supportive family" or "supportive families" or "community support" or "supportive community" or "supportive communities" or "health system support").ab,ti. OR exp directive counseling/ OR ("directive counseling" or "directive counsel" or "prescriptive counseling").ab,ti. OR exp patient care/ OR ("patient care team" or "patient care teams" or "health care team" or "health care teams" or "healthcare team" or "healthcare teams" or "health team" or "health teams" or "medical care team" or "medical care teams" or multidisciplinary or multi-disciplinary or interdisciplinary or inter-disciplinary or multidisciplinarity or multi-disciplinarity or interdisciplinarity or inter-disciplinarity or "team based" or "patient care management" or "patient management" or "care management" or "medication management" or "medication control" or "therapy management" or "therapy control" or "treatment management" or "treatment control" or "therapeutic management" or "therapeutic control" or "disease management" or "disease control" or "hypertension management" or "hypertension control" or "hypertensive management" or "hypertensive control" or "blood pressure management" or "blood pressure control" or "diabetes management" or "diabetes control" or "diabetic management" or "diabetic control" or "chronic condition management" or "chronic illness management" or "self management" or "self managed" or "self managing" or "self manages").ab,ti. OR exp self care/) AND (exp medication compliance/ OR ("medication adherence" or "medication adherent" or "medication compliance" or "medication compliant" or "adherence to medication" or "adherent to medication" or "compliance to medication" or "medication persistence" or "refill adherence" or "pharmaceutical adherence" or "pharmaceutical compliance" or "drug therapy adherence" or "drug therapy compliance" or "drug adherence" or "drug adherent" or "drug compliance" or "drug compliant").ab,ti. OR ((exp antidiabetic agent/ OR ("hypoglycemic agent" or "hypoglycemic agents" or "hypoglycemic drug" or "hypoglycemic drugs" or "hypoglycemic medication" or "hypoglycemic medications" or "hypoglycemic prescription" or "hypoglycemic prescriptions" or "hypoglycemics" or "antihyperglycemic agent" or "antihyperglycemic agents" or "antihyperglycemic drug" or "antihyperglycemic drugs" or "antihyperglycemic medication" or "antihyperglycemic medications" or "antihyperglycemic prescription" or "antihyperglycemic prescriptions" or "antihyperglycemics" or "anti-hyperglycemic agent" or "anti-hyperglycemic agents" or "anti-hyperglycemic drug" or "anti-hyperglycemic drugs" or "anti-hyperglycemic medication" or "anti-hyperglycemic medications" or "anti-hyperglycemic prescription" or "anti-hyperglycemic prescriptions" or "anti-hyperglycemics" or "antidiabetic agent" or "antidiabetic agents" or "antidiabetic drug" or "antidiabetic drugs" or "antidiabetic medication" or "antidiabetic medications" or "antidiabetic prescription" or "antidiabetic prescriptions" or "antidiabetics" or "anti-diabetic agent" or "anti-diabetic agents" or "anti-diabetic drug" or "anti-diabetic drugs" or "anti-diabetic medication" or "anti-diabetic medications" or "anti-diabetic prescription" or "anti-diabetic prescriptions" or "anti-diabetics").ab,ti. OR exp antihypertensive agent/ OR ("antihypertensive agent" or "antihypertensive agents" or "antihypertensive drug" or "antihypertensive drugs" or "antihypertensive medication" or "antihypertensive medications" or "antihypertensive prescription" or "antihypertensive prescriptions" or antihypertensives or "anti-hypertensive agent" or "anti-hypertensive agents" or "anti-hypertensive drug" or "anti-hypertensive drugs" or "anti-hypertensive medication" or "anti-hypertensive medications" or "anti-hypertensive prescription" or "anti-hypertensive prescriptions" or "anti-hypertensives").ab,ti.) AND (exp patient compliance/ OR (adherence or adherent or nonadherence or nonadherent or non-adherence or non-adherent or compliance or compliant or noncompliance or noncompliant or non-compliance or non-compliant).ab,ti.)))

993 Results

110 Results: copy and paste limit 1 to dc=20210101-20220525 into the search bar

**71** Results: limit to English and exclude Conference Abstracts
Link to 71 results: <https://proxy.library.vanderbilt.edu/login?url=http://ovidsp.ovid.com/ovidweb.cgi?T=JS&NEWS=N&PAGE=main&SHAREDSEARCHID=6JJxrR8g9xIiSxWcMWOeNHS2NCxOQK1nZ3El0rHDLFPPob0kpbDmv1jF3Gj9a0DTb> **PsycINFO (ProQuest):** <http://www.library.vanderbilt.edu/eres?id=143>
**Date Last Searched: 5/25/2022**

(TI("minority health") OR AB("minority health") OR MAINSUBJECT.EXACT.EXPLODE("Blacks") OR TI("African American") OR AB("African American") OR TI("African Americans") OR AB("African Americans") OR TI(black) OR AB(black) OR TI(blacks) OR AB(blacks) OR MAINSUBJECT.EXACT.EXPLODE("Minority Groups") OR TI(minority) OR AB(minority) OR TI(minorities) OR AB(minorities) OR MAINSUBJECT.EXACT.EXPLODE("Racial and Ethnic Differences") OR TI(race) OR AB(race) OR TI(racial) OR AB(racial) OR TI(racially) OR AB(racially) OR TI(ethnic) OR AB(ethnic) OR TI(ethnically) OR AB(ethnically) OR TI(ethnicity) OR AB(ethnicity) OR TI(underserved) OR AB(underserved)) AND (MAINSUBJECT.EXACT.EXPLODE("Diabetes") OR TI(diabetes) OR AB(diabetes) OR TI(diabetic) OR AB(diabetic) OR TI(diabetics) OR AB(diabetics) OR MAINSUBJECT.EXACT.EXPLODE("Hypertension") OR TI(hypertension) OR AB(hypertension) OR TI(hypertensive) OR AB(hypertensive) OR TI("high blood pressure") OR AB("high blood pressure") OR TI("high blood pressures") OR AB("high blood pressures") OR TI(ESRD) OR AB(ESRD) OR TI(ESKD) OR AB(ESKD) OR TI("end stage renal disease") OR AB("end stage renal disease") OR TI("end stage renal diseases") OR AB("end stage renal diseases") OR TI("end stage kidney disease") OR AB("end stage kidney disease") OR TI("end stage kidney diseases") OR AB("end stage kidney diseases") OR TI("end stage renal failure") OR AB("end stage renal failure") OR TI("end stage renal insufficiency") OR AB("end stage renal insufficiency") OR TI("end stage kidney failure") OR AB("end stage kidney failure") OR TI("chronic kidney disease") OR AB("chronic kidney disease") OR TI("chronic kidney diseases") OR AB("chronic kidney diseases") OR TI("chronic renal disease") OR AB("chronic renal disease") OR TI("chronic renal diseases") OR AB("chronic renal diseases") OR TI("chronic kidney failure") OR AB("chronic kidney failure") OR TI("chronic renal failure") OR AB("chronic renal failure") OR TI("chronic kidney insufficiency") OR AB("chronic kidney insufficiency") OR TI("chronic renal insufficiency") OR AB("chronic renal insufficiency") OR TI("chronic renal insufficiencies") OR AB("chronic renal insufficiencies") OR MAINSUBJECT.EXACT.EXPLODE("Hemodialysis") OR TI("renal dialysis") OR AB("renal dialysis") OR TI("renal dialyses") OR AB("renal dialyses") OR TI("kidney dialysis") OR AB("kidney dialysis") OR TI("extracorporeal dialysis") OR AB("extracorporeal dialysis") OR TI("extracorporeal dialyses") OR AB("extracorporeal dialyses") OR TI(hemodialysis) OR AB(hemodialysis) OR TI(hemodialyses) OR AB(hemodialyses) OR TI(haemodialysis) OR AB(haemodialysis) OR TI(haemodialyses) OR AB(haemodialyses)) AND (MAINSUBJECT.EXACT.EXPLODE("Therapeutic Alliance") OR TI("therapeutic alliance") OR AB("therapeutic alliance") OR TI("therapeutic alliances") OR AB("therapeutic alliances") OR TI("therapy alliance") OR AB("therapy alliance") OR TI("therapy alliances") OR AB("therapy alliances") OR TI("therapeutic relationship") OR AB("therapeutic relationship") OR TI("therapeutic relationships") OR AB("therapeutic relationships") OR TI("therapy relationship") OR AB("therapy relationship") OR TI("therapy relationships") OR AB("therapy relationships") OR TI("working alliance") OR AB("working alliance") OR TI("working alliances") OR AB("working alliances") OR MAINSUBJECT.EXACT.EXPLODE("Motivational Interviewing") OR TI("motivational interviewing") OR AB("motivational interviewing") OR TI("motivational interview") OR AB("motivational interview") OR TI("motivational interviews") OR AB("motivational interviews") OR TI("motivation interviewing") OR AB("motivation interviewing") OR TI("motivation interview") OR AB("motivation interview") OR TI("motivation interviews") OR AB("motivation interviews") OR MAINSUBJECT.EXACT.EXPLODE("Social Support") OR TI("social support") OR AB("social support") OR TI("psychosocial support") OR AB("psychosocial support") OR TI("psycho-social support") OR AB("psycho-social support") OR TI("support system") OR AB("support system") OR TI("support systems") OR AB("support systems") OR TI("family support") OR AB("family support") OR TI("familial support") OR AB("familial support") OR TI("family member support") OR AB("family member support") OR TI("supportive family") OR AB("supportive family") OR TI("supportive families") OR AB("supportive families") OR TI("community support") OR AB("community support") OR TI("supportive community") OR AB("supportive community") OR TI("supportive communities") OR AB("supportive communities") OR TI("health system support") OR AB("health system support") OR TI("directive counseling") OR AB("directive counseling") OR TI("directive counsel") OR AB("directive counsel") OR TI("prescriptive counseling") OR AB("prescriptive counseling") OR TI("patient care team") OR AB("patient care team") OR TI("patient care teams") OR AB("patient care teams") OR TI("health care team") OR AB("health care team") OR TI("health care teams") OR AB("health care teams") OR TI("healthcare team") OR AB("healthcare team") OR TI("healthcare teams") OR AB("healthcare teams") OR TI("health team") OR AB("health team") OR TI("health teams") OR AB("health teams") OR TI("medical care team") OR AB("medical care team") OR TI("medical care teams") OR AB("medical care teams") OR TI(multidisciplinary) OR AB(multidisciplinary) OR TI(multi-disciplinary) OR AB(multi-disciplinary) OR TI(interdisciplinary) OR AB(interdisciplinary) OR TI(inter-disciplinary) OR AB(inter-disciplinary) OR TI(multidisciplinarity) OR AB(multidisciplinarity) OR TI(multi-disciplinarity) OR AB(mutli-disciplinarity) OR TI(interdisciplinarity) OR AB(interdisciplinarity) OR TI(inter-disciplinarity) OR AB(inter-disciplinarity) TI("team based") OR AB("team based") OR MAINSUBJECT.EXACT.EXPLODE("Treatment Planning") OR TI("patient care management") OR AB("patient care management") OR TI("care management") OR AB("care management") OR TI("medication management") OR AB("medication management") OR TI("medication control") OR AB("medication control") OR TI("therapy management") OR AB("therapy management") OR TI("therapy control") OR AB("therapy control") OR TI("treatment management") OR AB("treatment management") OR TI("treatment control") OR AB("treatment control") OR TI("therapeutic management") OR AB("therapeutic management") OR TI("therapeutic control") OR AB("therapeutic control") OR TI("disease management") OR AB("disease management") OR TI("disease control") OR AB("disease control") OR TI("hypertension management") OR AB("hypertension management") OR TI("hypertension control") OR AB("hypertension control") OR TI("hypertensive management") OR AB("hypertensive management") OR TI("hypertensive control") OR AB("hypertensive control") OR TI("blood pressure management") OR AB("blood pressure management") OR TI("blood pressure control") OR AB("blood pressure control") OR TI("diabetes management") OR AB("diabetes management") OR TI("diabetes control") OR AB("diabetes control") OR TI("diabetic management") OR AB("diabetic management") OR TI("diabetic control") OR AB("diabetic control") OR TI("chronic condition management") OR AB("chronic condition management") OR TI("chronic illness management") OR AB("chronic illness management") OR MAINSUBJECT.EXACT.EXPLODE("Self-Management") OR TI("self management") OR AB("self management") OR TI("self managed") OR AB("self managed") OR TI("self managing") OR AB("self managing") OR TI("self manages") OR AB("self manages")) AND (TI("medication adherence") OR AB("medication adherence") OR TI("medication adherent") OR AB("medication adherent") OR TI("medication compliance") OR AB("medication compliance") OR TI("medication compliant") OR AB("medication compliant") OR TI("adherence to medication") OR AB("adherence to medication") OR TI("adherent to medication") OR AB("adherent to medication") OR TI("compliance to medication") OR AB("compliance to medication") OR TI("compliant to medication") OR AB("compliant to medication") OR TI("medication persistence") OR AB("medication persistence") OR TI("refill adherence") OR AB("refill adherence") OR TI("pharmaceutical adherence") OR AB("pharmaceutical adherence") OR TI("pharmaceutical compliance") OR AB("pharmaceutical compliance") OR TI("drug therapy adherence") OR AB("drug therapy adherence") OR TI("drug therapy compliance") OR AB("drug therapy compliance") OR TI("drug adherence") OR AB("drug adherence") OR TI("drug adherent") OR AB("drug adherent") OR TI("drug compliance") OR AB("drug compliance") OR TI("drug compliant") OR AB("drug compliant") OR ((TI("hypoglycemic agent") OR AB("hypoglycemic agent") OR TI("hypoglycemic agents") OR AB("hypoglycemic agents") OR TI("hypoglycemic drug") OR AB("hypoglycemic drug") OR TI("hypoglycemic drugs") OR AB("hypoglycemic drugs") OR TI("hypoglycemic medication") OR AB("hypoglycemic medication") OR TI("hypoglycemic medications") OR AB("hypoglycemic medications") OR TI("hypoglycemic prescription") OR AB("hypoglycemic prescriptions") OR TI(hypoglycemics) OR AB(hypoglycemics) OR TI("antihyperglycemic agent") OR AB("antihyperglycemic agent") OR TI("antihyperglycemic agents") OR AB("antihyperglycemic agents") OR TI("antihyperglycemic drug") OR AB("antihyperglycemic drug") OR TI("antihyperglycemic drugs") OR AB("antihyperglycemic drugs") OR TI("antihyperglycemic medication") OR AB("antihyperglycemic medication") OR TI("antihyperglycemic medications") OR AB("antihyperglycemic medications") OR TI("antihyperglycemic prescription") OR AB("antihyperglycemic prescription") OR TI("antihyperglycemic prescriptions") OR AB("antihyperglycemic prescriptions") OR TI(antihyperglycemics) OR AB(antihyperglycemics) OR TI("anti-hyperglycemic agent") OR AB("anti-hyperglycemic agent") OR TI("anti-hyperglycemic agents") OR AB("anti-hyperglycemic agents") OR TI("anti-hyperglycemic drug") OR AB("anti-hyperglycemic drug") OR TI("anti-hyperglycemic drugs") OR AB("anti-hyperglycemic drugs") OR TI("anti-hyperglycemic medication") OR AB("anti-hyperglycemic medication") OR TI("anti-hyperglycemic medications") OR AB("anti-hyperglycemic medications") OR TI("anti-hyperglycemic prescription") OR AB("anti-hyperglycemic prescription") OR TI("anti-hyperglycemic prescriptions") OR AB("anti-hyperglycemic prescriptions") OR TI(anti-hyperglycemics) OR AB(anti-hyperglycemics) OR TI("antidiabetic agent") OR AB("antidiabetic agent") OR TI("antidiabetic agents") OR AB("antidiabetic agents") OR TI("antidiabetic drug") OR AB("antidiabetic drug") OR TI("antidiabetic drugs") OR AB("antidiabetic drugs") OR TI("antidiabetic medication") OR AB("antidiabetic medication") OR TI("antidiabetic medications") OR AB("antidiabetic medications") OR TI("antidiabetic prescription") OR AB("antidiabetic prescription") OR TI("antidiabetic prescriptions") OR AB("antidiabetic prescriptions") OR TI(antidiabetics) OR AB(antidiabetics) OR TI("anti-diabetic agent") OR AB("anti-diabetic agent") OR TI("anti-diabetic agents") OR AB("anti-diabetic agents") OR TI("anti-diabetic drug") OR AB("anti-diabetic drug") OR TI("anti-diabetic drugs") OR AB("anti-diabetic drugs") OR TI("anti-diabetic medication") OR AB("anti-diabetic medication") OR TI("anti-diabetic medications") OR AB("anti-diabetic medications") OR TI("anti-diabetic prescription") OR AB("anti-diabetic prescription") OR TI("anti-diabetic prescriptions") OR AB("anti-diabetic prescriptions") OR TI(anti-diabetics) OR AB(anti-diabetics) OR MAINSUBJECT.EXACT.EXPLODE("Antihypertensive Drugs") OR TI("antihypertensive agent") OR AB("antihypertensive agent") OR TI("antihypertensive agents") OR AB("antihypertensive agents") OR TI("antihypertensive drug") OR AB("antihypertensive drug") OR TI("antihypertensive drugs") OR AB("antihypertensive drugs") OR TI("antihypertensive medication") OR AB("antihypertensive medication") OR TI("antihypertensive medications") OR AB("antihypertensive medications") OR TI("antihypertensive prescription") OR AB("antihypertensive prescription") OR TI("antihypertensive prescriptions") OR AB("antihypertensive prescriptions") OR TI(antihypertensives) OR AB(antihypertensives) OR TI("anti-hypertensive agent") OR AB("anti-hypertensive agent") OR TI("anti-hypertensive agents") OR AB("anti-hypertensive agents") OR TI("anti-hypertensive drug") OR AB("anti-hypertensive drug") OR TI("anti-hypertensive drugs") OR AB("anti-hypertensive drugs") OR TI("anti-hypertensive medication") OR AB("anti-hypertensive medication") OR TI("anti-hypertensive medications") OR AB("anti-hypertensive medications") OR TI("anti-hypertensive prescription") OR AB("anti-hypertensive prescription") OR TI("anti-hypertensive prescriptions") OR AB("anti-hypertensive prescriptions") OR TI(anti-hypertensives) OR AB(anti-hypertensives)) AND (MAINSUBJECT.EXACT.EXPLODE("Treatment Compliance") OR TI(adherence) OR AB(adherence) OR TI(adherent) OR AB(adherent) OR TI(nonadherence) OR AB(nonadherence) OR TI(nonadherent) OR AB(nonadherent) OR TI(non-adherence) OR AB(non-adherence) OR TI(non-adherent) OR AB(non-adherent) OR TI(compliance) OR AB(compliance) OR TI(compliant) OR AB(compliant) OR TI(noncompliance) OR AB(noncompliance) OR TI(noncompliant) OR AB(noncompliant) OR TI(non-compliance) OR AB(non-compliance) OR TI(non-compliant) OR AB(non-compliant)))) AND PD(20210101-20220525) AND LA(English)

**7** Results

Limited to publication dates 1/1/2021 - 5/25/2022

Limited to English

**Supplemental Box 1: Modified risk of bias assessment**

| **For the RCTs,** the following were assessed for each of the included studies:  1. Sequence generation – was the allocation sequence random?  2. Allocation concealment – was the allocation sequence concealed until participants were enrolled and assigned to interventions?  3. Blinding – were participants unaware of their assigned intervention during the trial?  4. Level of completion of outcome data - were data for this outcome available for all, or nearly all, participants randomized?  5. Similarity of groups at baseline – did baseline differences between intervention groups suggest a problem with the randomization process?  6. Loss of data (dropouts and withdrawals) -  a. Were outcome data available for all, or nearly all participants?  b. Were participants excluded due to missing data?  **For pre-post studies,** each study was assessed for its ability to avoid, control or adjust for the following:  1. Baseline confounding  o  – was there minimal or no potential for confounding of the effect of intervention in this study?  o  - did the authors use an appropriate analysis method that controlled for all the important confounding domains?         2.    Selection bias – was there adequate effort to avoid selection of participants into the study (or into the analysis) based on participant characteristics observed after the start of intervention?       3.      Bias in measurement of exposures and outcomes – was there no or minimal chance of the outcome measure being influenced by knowledge of the intervention received?  4. Bias due to deviations from intended interventions  o  Was the intervention implemented successfully across intervention groups?  o  Did study participants adhere to the assigned intervention regimen?  5. Selective reporting of analyses or outcomes, or both – was there minimal or no chance of the reported effect estimate likely to be selected on the basis of the results, from:  o  Multiple outcome measurements within the outcome domain?  o  Multiple analyses of the intervention-outcome relationship?  o  Different subgroups?  6. Bias due to missing data  a. Were outcome data available for all, or nearly all participants?  b. Were participants excluded due to missing data?  For the pre-post studies, ‘no’ in any of the sub-questions, resulted in scoring that entire question as ‘no’.  **Scoring:**  Greater than or equal to 4 ‘yes’ - Low risk  2 -3 ’yes’ – medium risk  1 ‘yes’ – high risk |
| --- |
